# Supplementary material for: Matching precursor kinetics to afford a more robust CVD chemistry: a case study of the C chemistry for silicon carbide using SiF4 as Si precursor
Source: Royal Society of Chemistry journal article supplement (doi:10.1039/c7tc00138j), 2017-01-01
Supplement: c7tc00138j1.pdf [file c7tc00138j1.pdf]

**Electronic supplementary information (ESI) for:**

**Matching precursor kinetics to afford a more robust CVD chemistry: a case  
study of the C chemistry for silicon carbide using SiF<sub>4</sub> as Si precursor**

Pontus Stenberg, Örjan Danielsson, Edvin Erdtman, Pitsiri Sukkaew, Lars Ojamäe,

Erik Janzén, Henrik Pedersen\*

Department of Physics, Chemistry and Biology, Linköping University, SE-581 83 Linköping,  
Sweden

\* [henrik.pedersen@liu.se](mailto:henrik.pedersen@liu.se)

**Supporting Table 1.** Chemical reaction scheme for the kinetic model.

|    | Reaction                                                                                                                        | Forward reaction rate<br>(cm <sup>3</sup> , mol, s) |                        |                                          | Backward reaction rate<br>(cm <sup>3</sup> , mol, s) |                        |          | Ref.  |  |
|----|---------------------------------------------------------------------------------------------------------------------------------|-----------------------------------------------------|------------------------|------------------------------------------|------------------------------------------------------|------------------------|----------|-------|--|
|    |                                                                                                                                 | A                                                   | n                      | Ea/R<br>(K)                              | A                                                    | n                      | Ea/R (K) |       |  |
| 1  | H <sub>2</sub> + H <sub>2</sub> ⇌ H + H + H <sub>2</sub>                                                                        | 9.033·10 <sup>14</sup>                              | 0                      | 48350                                    | by equilibrium                                       |                        |          | 1     |  |
| 2  | CH <sub>3</sub> + H <sub>2</sub> ⇌ CH <sub>4</sub> + H                                                                          | 1.084·10 <sup>3</sup>                               | 2.88                   | 4060                                     | 6.142·10 <sup>5</sup>                                | 2.50                   | 4825     | 2     |  |
| 3  | CH <sub>3</sub> + CH <sub>3</sub> ⇌ C <sub>2</sub> H <sub>5</sub> + H                                                           | 5.420·10 <sup>13</sup>                              | 0                      | 8080                                     | 3.613·10 <sup>13</sup>                               | 0                      | 0        | 2     |  |
| 4  | CH <sub>3</sub> + CH <sub>3</sub> + M ⇌ C <sub>2</sub> H <sub>6</sub> + M                                                       | Pressure dependent                                  |                        |                                          |                                                      |                        |          | 2     |  |
|    |                                                                                                                                 | k <sub>0</sub>                                      | 1.269·10 <sup>41</sup> | -7.00                                    | 1390                                                 | 1.566·10 <sup>49</sup> | -8.37    | 47290 |  |
|    |                                                                                                                                 | k <sub>∞</sub>                                      | 3.613·10 <sup>13</sup> | 0                                        | 0                                                    | 4.500·10 <sup>21</sup> | -1.37    | 45900 |  |
|    | Troé parameters: a = 0.62, T* = 1180, T*** = 73                                                                                 |                                                     |                        | a = 0.62, T* = 1180, T*** = 73           |                                                      |                        |          |       |  |
| 5  | CH <sub>4</sub> + M ⇌ CH <sub>3</sub> + H + M                                                                                   | Pressure dependent                                  |                        |                                          |                                                      |                        |          | 1     |  |
|    |                                                                                                                                 | k <sub>0</sub>                                      | 7.226·10 <sup>17</sup> | 0                                        | 47000                                                | 6.467·10 <sup>23</sup> | -1.80    | 0     |  |
|    |                                                                                                                                 | k <sub>∞</sub>                                      | 2.400·10 <sup>16</sup> | 0                                        | 52800                                                | 2.108·10 <sup>14</sup> | 0        | 0     |  |
|    | Troé parameters: a = 1, T* = 1350, T*** = 1, T** = 7830                                                                         |                                                     |                        | a = 0.37, T* = 61, T*** = 3315           |                                                      |                        |          |       |  |
| 6  | CH <sub>4</sub> + CH <sub>3</sub> ⇌ C <sub>2</sub> H <sub>5</sub> + H <sub>2</sub>                                              | 1.024·10 <sup>13</sup>                              | 0                      | 11500                                    | by equilibrium                                       |                        |          | 3     |  |
| 7  | C <sub>2</sub> H <sub>2</sub> + H + M ⇌ C <sub>2</sub> H <sub>3</sub> + M                                                       | Pressure dependent                                  |                        |                                          |                                                      |                        |          | 2     |  |
|    |                                                                                                                                 | k <sub>0</sub>                                      | 5.802·10 <sup>27</sup> | -3.47                                    | 475                                                  | 3.975·10 <sup>27</sup> | -3.50    | 18070 |  |
|    |                                                                                                                                 | k <sub>∞</sub>                                      | 5.540·10 <sup>8</sup>  | 1.64                                     | 1055                                                 | 3.900·10 <sup>8</sup>  | 1.62     | 18650 |  |
|    | Troé parameters: a = -0.98, T* = 6000, T*** = 10, T** = 0                                                                       |                                                     |                        | a = -0.98, T* = 6000, T*** = 10, T** = 0 |                                                      |                        |          |       |  |
| 8  | C <sub>2</sub> H <sub>2</sub> + H <sub>2</sub> ⇌ C <sub>2</sub> H <sub>3</sub> + H                                              | 2.409·10 <sup>12</sup>                              | 0                      | 32714                                    | 1.204·10 <sup>13</sup>                               | 0.00                   | 0        | 4, 5  |  |
| 9  | C <sub>2</sub> H <sub>3</sub> + H <sub>2</sub> ⇌ C <sub>2</sub> H <sub>4</sub> + H                                              | 3.016·10 <sup>4</sup>                               | 2.63                   | 4306                                     | 2.349·10 <sup>2</sup>                                | 3.62                   | 5670     | 4, 2  |  |
| 10 | C <sub>2</sub> H <sub>3</sub> + CH <sub>3</sub> ⇌ C <sub>2</sub> H <sub>2</sub> + CH <sub>4</sub>                               | 3.914·10 <sup>11</sup>                              | 0                      | 0                                        | by equilibrium                                       |                        |          | 4     |  |
| 11 | C <sub>2</sub> H <sub>3</sub> + CH <sub>3</sub> ⇌ C <sub>3</sub> H <sub>6</sub>                                                 | 1.000·10 <sup>10</sup>                              | 1.00                   | 0                                        | 1.099·10 <sup>21</sup>                               | -1.20                  | 49191    | 6     |  |
| 12 | C <sub>2</sub> H <sub>3</sub> + CH <sub>4</sub> ⇌ C <sub>2</sub> H <sub>4</sub> + CH <sub>3</sub>                               | 1.451·10 <sup>0</sup>                               | 4.02                   | 2754                                     | 6.022·10 <sup>7</sup>                                | 1.56                   | 8370     | 4     |  |
| 13 | C <sub>2</sub> H <sub>3</sub> + C <sub>2</sub> H <sub>3</sub> ⇌ C <sub>2</sub> H <sub>4</sub> + C <sub>2</sub> H <sub>2</sub>   | 8.431·10 <sup>13</sup>                              | 0                      | 0                                        | 2.409·10 <sup>13</sup>                               | 0                      | 34398    | 2, 4  |  |
| 14 | C <sub>2</sub> H <sub>4</sub> + M ⇌ C <sub>2</sub> H <sub>2</sub> + H <sub>2</sub> + M                                          | 7.950·10 <sup>12</sup>                              | 0.44                   | 44741                                    | by equilibrium                                       |                        |          | 4     |  |
| 15 | C <sub>2</sub> H <sub>4</sub> + M ⇌ C <sub>2</sub> H <sub>3</sub> + H + M                                                       | 2.589·10 <sup>17</sup>                              | 0                      | 48600                                    | by equilibrium                                       |                        |          | 2     |  |
| 16 | C <sub>2</sub> H <sub>4</sub> + H + M ⇌ C <sub>2</sub> H <sub>5</sub> + M                                                       | 8.414·10 <sup>8</sup>                               | 1.49                   | 499                                      | 4.900·10 <sup>9</sup>                                | 1.19                   | 18642    | 4     |  |
| 17 | C <sub>2</sub> H <sub>4</sub> + H <sub>2</sub> ⇌ C <sub>2</sub> H <sub>5</sub> + H                                              | 1.018·10 <sup>13</sup>                              | 0                      | 34278                                    | 4.215·10 <sup>13</sup>                               | 0                      | 0        | 4, 2  |  |
| 18 | C <sub>2</sub> H <sub>4</sub> + CH <sub>3</sub> ⇌ i-C <sub>3</sub> H <sub>7</sub>                                               | 4.600·10 <sup>4</sup>                               | 1.00                   | 2160                                     | 1.995·10 <sup>10</sup>                               | 0                      | 14855    | 6, 7  |  |
| 19 | C <sub>2</sub> H <sub>4</sub> + CH <sub>3</sub> ⇌ n-C <sub>3</sub> H <sub>7</sub>                                               | 2.200·10 <sup>8</sup>                               | 1.00                   | 2916                                     | 9.550·10 <sup>13</sup>                               | 0                      | 15610    | 6, 7  |  |
| 20 | C <sub>2</sub> H <sub>4</sub> + C <sub>2</sub> H <sub>4</sub> ⇌ C <sub>2</sub> H <sub>5</sub> + C <sub>2</sub> H <sub>3</sub>   | 4.818·10 <sup>14</sup>                              | 0                      | 35961                                    | 4.818·10 <sup>11</sup>                               | 0                      | 0        | 20    |  |
| 21 | C <sub>2</sub> H <sub>5</sub> + H ⇌ C <sub>2</sub> H <sub>6</sub>                                                               | 5.446·10 <sup>13</sup>                              | 0.16                   | 0                                        | 3.076·10 <sup>42</sup>                               | -7.93                  | 55895    | 8, 9  |  |
| 22 | C <sub>2</sub> H <sub>5</sub> + H <sub>2</sub> ⇌ C <sub>2</sub> H <sub>6</sub> + H                                              | 3.071·10 <sup>0</sup>                               | 3.60                   | 4250                                     | 1.445·10 <sup>9</sup>                                | 1.50                   | 3730     | 2, 5  |  |
| 23 | C <sub>2</sub> H <sub>5</sub> + CH <sub>3</sub> ⇌ C <sub>2</sub> H <sub>4</sub> + CH <sub>4</sub>                               | 9.033·10 <sup>11</sup>                              | 0                      | 0                                        | by equilibrium                                       |                        |          | 2     |  |
| 24 | C <sub>2</sub> H <sub>5</sub> + CH <sub>4</sub> ⇌ C <sub>2</sub> H <sub>6</sub> + CH <sub>3</sub>                               | 8.618·10 <sup>-2</sup>                              | 4.14                   | 6322                                     | 1.506·10 <sup>-7</sup>                               | 6.00                   | 3043     | 4, 5  |  |
| 25 | C <sub>2</sub> H <sub>5</sub> + C <sub>2</sub> H <sub>3</sub> ⇌ C <sub>2</sub> H <sub>6</sub> + C <sub>2</sub> H <sub>2</sub>   | 4.818·10 <sup>11</sup>                              | 0                      | 0                                        | by equilibrium                                       |                        |          | 4     |  |
| 26 | C <sub>2</sub> H <sub>5</sub> + C <sub>2</sub> H <sub>4</sub> ⇌ C <sub>2</sub> H <sub>6</sub> + C <sub>2</sub> H <sub>3</sub>   | 4.878·10 <sup>-7</sup>                              | 5.82                   | 6000                                     | 6.014·10 <sup>2</sup>                                | 3.30                   | 5280     | 2, 4  |  |
| 27 | C <sub>2</sub> H <sub>5</sub> + C <sub>2</sub> H <sub>5</sub> ⇌ C <sub>2</sub> H <sub>6</sub> + C <sub>2</sub> H <sub>4</sub>   | 1.385·10 <sup>12</sup>                              | 0                      | 0                                        | by equilibrium                                       |                        |          | 2     |  |
| 28 | C <sub>3</sub> H <sub>6</sub> + H ⇌ i-C <sub>3</sub> H <sub>7</sub>                                                             | 1.319·10 <sup>13</sup>                              | 0                      | 785                                      | 6.310·10 <sup>13</sup>                               | 0                      | 18581    | 10, 7 |  |
| 29 | C <sub>3</sub> H <sub>6</sub> + H ⇌ n-C <sub>3</sub> H <sub>7</sub>                                                             | 1.319·10 <sup>13</sup>                              | 0                      | 1636                                     | 1.259·10 <sup>14</sup>                               | 0                      | 18632    | 10, 7 |  |
| 30 | C <sub>3</sub> H <sub>6</sub> + C <sub>2</sub> H <sub>4</sub> ⇌ i-C <sub>3</sub> H <sub>7</sub> + C <sub>2</sub> H <sub>3</sub> | 7.226·10 <sup>15</sup>                              | -0.65                  | 37051                                    | by equilibrium                                       |                        |          | 10    |  |
| 31 | C <sub>3</sub> H <sub>6</sub> + C <sub>2</sub> H <sub>4</sub> ⇌ n-C <sub>3</sub> H <sub>7</sub> + C <sub>2</sub> H <sub>3</sub> | 6.022·10 <sup>13</sup>                              | 0                      | 37966                                    | by equilibrium                                       |                        |          | 10    |  |
| 32 | i-C <sub>3</sub> H <sub>7</sub> + H ⇌ C <sub>3</sub> H <sub>6</sub> + H <sub>2</sub>                                            | 3.613·10 <sup>12</sup>                              | 0                      | 0                                        | by equilibrium                                       |                        |          | 11    |  |
| 33 | n-C <sub>3</sub> H <sub>7</sub> + H ⇌ C <sub>3</sub> H <sub>6</sub> + H <sub>2</sub>                                            | 1.813·10 <sup>12</sup>                              | 0                      | 0                                        | by equilibrium                                       |                        |          | 11    |  |
| 34 | i-C <sub>3</sub> H <sub>7</sub> + CH <sub>3</sub> ⇌ C <sub>3</sub> H <sub>6</sub> + CH <sub>4</sub>                             | 9.408·10 <sup>10</sup>                              | 0.68                   | 0                                        | by equilibrium                                       |                        |          | 11    |  |
| 35 | n-C <sub>3</sub> H <sub>7</sub> + CH <sub>3</sub> ⇌ C <sub>3</sub> H <sub>6</sub> + CH <sub>4</sub>                             | 1.145·10 <sup>13</sup>                              | -0.32                  | 0                                        | by equilibrium                                       |                        |          | 11    |  |
| 36 | i-C <sub>3</sub> H <sub>7</sub> + C <sub>2</sub> H <sub>3</sub> ⇌ C <sub>3</sub> H <sub>8</sub> + C <sub>2</sub> H <sub>2</sub> | 1.520·10 <sup>14</sup>                              | -0.70                  | 0                                        | by equilibrium                                       |                        |          | 11    |  |
| 37 | n-C <sub>3</sub> H <sub>7</sub> + C <sub>2</sub> H <sub>3</sub> ⇌ C <sub>3</sub> H <sub>8</sub> + C <sub>2</sub> H <sub>2</sub> | 1.210·10 <sup>12</sup>                              | 0                      | 0                                        | by equilibrium                                       |                        |          | 11    |  |
| 38 | i-C <sub>3</sub> H <sub>7</sub> + C <sub>2</sub> H <sub>4</sub> ⇌ C <sub>3</sub> H <sub>6</sub> + C <sub>2</sub> H <sub>5</sub> | 2.650·10 <sup>10</sup>                              | 0                      | 3320                                     | by equilibrium                                       |                        |          | 11    |  |
| 39 | n-C <sub>3</sub> H <sub>7</sub> + C <sub>2</sub> H <sub>4</sub> ⇌ C <sub>3</sub> H <sub>6</sub> + C <sub>2</sub> H <sub>5</sub> | 2.650·10 <sup>9</sup>                               | 0                      | 3320                                     | by equilibrium                                       |                        |          | 11    |  |

|    |                                                                                                                  |                       |       |       |                       |      |       |       |
|----|------------------------------------------------------------------------------------------------------------------|-----------------------|-------|-------|-----------------------|------|-------|-------|
| 40 | $i\text{-C}_3\text{H}_7 + \text{C}_2\text{H}_5 \rightleftharpoons \text{C}_3\text{H}_6 + \text{C}_2\text{H}_6$   | $2.300 \cdot 10^{13}$ | -0.35 | 0     | by equilibrium        |      |       | 11    |
| 41 | $n\text{-C}_3\text{H}_7 + \text{C}_2\text{H}_5 \rightleftharpoons \text{C}_3\text{H}_6 + \text{C}_2\text{H}_6$   | $1.451 \cdot 10^{12}$ | 0     | 0     | by equilibrium        |      |       | 11    |
| 42 | $i\text{-C}_3\text{H}_7 + \text{C}_2\text{H}_5 \rightleftharpoons \text{C}_3\text{H}_8 + \text{C}_2\text{H}_4$   | $1.844 \cdot 10^{13}$ | -0.35 | 0     | by equilibrium        |      |       | 11    |
| 43 | $n\text{-C}_3\text{H}_7 + \text{C}_2\text{H}_5 \rightleftharpoons \text{C}_3\text{H}_8 + \text{C}_2\text{H}_4$   | $1.150 \cdot 10^{12}$ | 0     | 0     | by equilibrium        |      |       | 11    |
| 44 | $i\text{-C}_3\text{H}_7 + i\text{-C}_3\text{H}_7 \rightleftharpoons \text{C}_3\text{H}_8 + \text{C}_3\text{H}_6$ | $2.529 \cdot 10^{12}$ | 0     | 0     | by equilibrium        |      |       | 2     |
| 45 | $i\text{-C}_3\text{H}_7 + n\text{-C}_3\text{H}_7 \rightleftharpoons \text{C}_3\text{H}_8 + \text{C}_3\text{H}_6$ | $5.143 \cdot 10^{13}$ | -0.35 | 0     | by equilibrium        |      |       | 11    |
| 46 | $n\text{-C}_3\text{H}_7 + n\text{-C}_3\text{H}_7 \rightleftharpoons \text{C}_3\text{H}_8 + \text{C}_3\text{H}_6$ | $1.686 \cdot 10^{12}$ | 0     | 0     | by equilibrium        |      |       | 11    |
| 47 | $\text{C}_3\text{H}_8 \rightleftharpoons \text{C}_2\text{H}_5 + \text{CH}_3$                                     | $1.100 \cdot 10^{17}$ | 0     | 42456 | $3.673 \cdot 10^{13}$ | 0    | 0     | 5, 2  |
| 48 | $\text{C}_3\text{H}_8 \rightleftharpoons i\text{-C}_3\text{H}_7 + \text{H}$                                      | $7.200 \cdot 10^{14}$ | -0.03 | 47958 | $2.000 \cdot 10^{13}$ | 0    | 0     | 6     |
| 49 | $\text{C}_3\text{H}_8 \rightleftharpoons n\text{-C}_3\text{H}_7 + \text{H}$                                      | $7.600 \cdot 10^{15}$ | -0.34 | 50356 | $2.000 \cdot 10^{13}$ | 0    | 0     | 6     |
| 50 | $\text{C}_3\text{H}_8 + \text{H} \rightleftharpoons i\text{-C}_3\text{H}_7 + \text{H}_2$                         | $8.700 \cdot 10^6$    | 2.00  | 2518  | $7.800 \cdot 10^{12}$ | 0    | 7991  | 6     |
| 51 | $\text{C}_3\text{H}_8 + \text{H} \rightleftharpoons n\text{-C}_3\text{H}_7 + \text{H}_2$                         | $5.600 \cdot 10^7$    | 2.00  | 3877  | $9.100 \cdot 10^{12}$ | 0    | 7281  | 6     |
| 52 | $\text{C}_3\text{H}_8 + \text{CH}_3 \rightleftharpoons i\text{-C}_3\text{H}_7 + \text{CH}_4$                     | $1.097 \cdot 10^{15}$ | 0     | 12659 | $4.400 \cdot 10^{15}$ | 1.00 | 16174 | 7, 6  |
| 53 | $\text{C}_3\text{H}_8 + \text{CH}_3 \rightleftharpoons n\text{-C}_3\text{H}_7 + \text{CH}_4$                     | $1.097 \cdot 10^{15}$ | 0     | 12659 | $4.400 \cdot 10^{15}$ | 1.00 | 16174 | 7, 6  |
| 54 | $\text{C}_3\text{H}_8 + \text{C}_2\text{H}_3 \rightleftharpoons i\text{-C}_3\text{H}_7 + \text{C}_2\text{H}_4$   | $1.000 \cdot 10^{11}$ | 0     | 5237  | by equilibrium        |      |       | 7     |
| 55 | $\text{C}_3\text{H}_8 + \text{C}_2\text{H}_3 \rightleftharpoons n\text{-C}_3\text{H}_7 + \text{C}_2\text{H}_4$   | $1.000 \cdot 10^{11}$ | 0     | 5237  | by equilibrium        |      |       | 7     |
| 56 | $\text{C}_3\text{H}_8 + \text{C}_2\text{H}_5 \rightleftharpoons i\text{-C}_3\text{H}_7 + \text{C}_2\text{H}_6$   | $1.000 \cdot 10^{11}$ | 0     | 5237  | by equilibrium        |      |       | 7     |
| 57 | $\text{C}_3\text{H}_8 + \text{C}_2\text{H}_5 \rightleftharpoons n\text{-C}_3\text{H}_7 + \text{C}_2\text{H}_6$   | $1.000 \cdot 10^{11}$ | 0     | 5237  | by equilibrium        |      |       | 7     |
| 58 | $\text{C}_3\text{H}_8 + i\text{-C}_3\text{H}_7 \rightleftharpoons \text{C}_3\text{H}_8 + n\text{-C}_3\text{H}_7$ | $8.430 \cdot 10^{-3}$ | 4.20  | 4390  | $8.400 \cdot 10^{-4}$ | 4.00 | 2381  | 11    |
| 59 | $\text{SiF}_4 + \text{H} \rightleftharpoons \text{SiF}_3 + \text{HF}$                                            | $1.402 \cdot 10^{10}$ | 1.54  | 29012 | by equilibrium        |      |       | calc. |
| 60 | $\text{SiF}_3 + \text{H} \rightleftharpoons \text{SiHF}_3$                                                       | $1.618 \cdot 10^7$    | 1.48  | 2.24  | by equilibrium        |      |       | calc. |
| 61 | $\text{SiHF}_3 \rightleftharpoons \text{SiF}_2 + \text{HF}$                                                      | $6.129 \cdot 10^{12}$ | 0.54  | 44230 | by equilibrium        |      |       | calc. |
| 62 | $\text{SiHF}_3 + \text{HF} \rightleftharpoons \text{SiF}_4 + \text{H}_2$                                         | $3.593 \cdot 10^3$    | 2.51  | 15393 | by equilibrium        |      |       | calc. |
| 63 | $\text{SiHF}_3 + \text{H} \rightleftharpoons \text{SiF}_3 + \text{H}_2$                                          | $6.893 \cdot 10^8$    | 1.76  | 3375  | by equilibrium        |      |       | calc. |
| 64 | $\text{SiHF}_3 + \text{H} \rightleftharpoons \text{SiHF}_2 + \text{HF}$                                          | $2.189 \cdot 10^9$    | 1.58  | 28106 | by equilibrium        |      |       | calc. |
| 65 | $\text{SiHF}_2 \rightleftharpoons \text{SiF} + \text{HF}$                                                        | $1.706 \cdot 10^{12}$ | 0.51  | 33602 | by equilibrium        |      |       | calc. |
| 66 | $\text{SiHF}_2 \rightleftharpoons \text{SiF}_2 + \text{H}$                                                       | $5.758 \cdot 10^{12}$ | 0.38  | 18967 | by equilibrium        |      |       | calc. |
| 67 | $\text{SiHF}_2 + \text{H} \rightleftharpoons \text{SiH}_2\text{F}_2$                                             | $3.207 \cdot 10^{13}$ | 0.58  | 45761 | by equilibrium        |      |       | calc. |
| 68 | $\text{SiHF}_2 + \text{HF} \rightleftharpoons \text{SiF}_3 + \text{H}_2$                                         | $1.938 \cdot 10^3$    | 2.44  | 13513 | by equilibrium        |      |       | calc. |
| 69 | $\text{SiH}_2\text{F}_2 \rightleftharpoons \text{SiF}_2 + \text{H}_2$                                            | $1.079 \cdot 10^{12}$ | 0.58  | 41421 | by equilibrium        |      |       | calc. |
| 70 | $\text{SiH}_2\text{F}_2 \rightleftharpoons \text{SiHF} + \text{HF}$                                              | $3.164 \cdot 10^{12}$ | 0.57  | 45220 | by equilibrium        |      |       | calc. |
| 71 | $\text{SiH}_2\text{F}_2 + \text{HF} \rightleftharpoons \text{SiHF}_3 + \text{H}_2$                               | $3.549 \cdot 10^3$    | 2.45  | 13811 | by equilibrium        |      |       | calc. |
| 72 | $\text{SiH}_2\text{F}_2 + \text{H} \rightleftharpoons \text{SiH}_2\text{F} + \text{HF}$                          | $3.019 \cdot 10^9$    | 1.66  | 25835 | by equilibrium        |      |       | calc. |
| 73 | $\text{SiH}_2\text{F}_2 + \text{H} \rightleftharpoons \text{SiHF}_2 + \text{H}_2$                                | $4.712 \cdot 10^8$    | 1.76  | 2372  | by equilibrium        |      |       | calc. |
| 74 | $\text{SiH}_2\text{F} \rightleftharpoons \text{SiF} + \text{H}_2$                                                | $3.667 \cdot 10^{11}$ | 0.62  | 24003 | by equilibrium        |      |       | calc. |
| 75 | $\text{SiH}_2\text{F} + \text{H} \rightleftharpoons \text{SiH}_3\text{F}$                                        | $1.097 \cdot 10^7$    | 1.42  | 2.37  | by equilibrium        |      |       | calc. |
| 76 | $\text{SiH}_2\text{F} + \text{HF} \rightleftharpoons \text{SiHF}_2 + \text{H}_2$                                 | $2.253 \cdot 10^3$    | 2.45  | 13784 | by equilibrium        |      |       | calc. |
| 77 | $\text{SiH}_3\text{F} \rightleftharpoons \text{SiHF} + \text{H}_2$                                               | $1.729 \cdot 10^{12}$ | 0.58  | 32318 | by equilibrium        |      |       | calc. |
| 78 | $\text{SiH}_3\text{F} + \text{H} \rightleftharpoons \text{SiH}_2\text{F} + \text{H}_2$                           | $9.951 \cdot 10^8$    | 1.71  | 1814  | by equilibrium        |      |       | calc. |
| 79 | $\text{SiH}_3\text{F} + \text{HF} \rightleftharpoons \text{SiH}_2\text{F}_2 + \text{H}_2$                        | $1.029 \cdot 10^4$    | 2.38  | 13503 | by equilibrium        |      |       | calc. |
| 80 | $\text{SiHF} + \text{H} \rightleftharpoons \text{SiH}_2\text{F}$                                                 | $7.666 \cdot 10^7$    | 1.54  | 2.11  | by equilibrium        |      |       | calc. |
| 81 | $\text{SiHF} + \text{HF} \rightleftharpoons \text{SiF}_2 + \text{H}_2$                                           | $3.956 \cdot 10^3$    | 2.37  | 1094  | by equilibrium        |      |       | calc. |
| 82 | $\text{SiF} + \text{H} \rightleftharpoons \text{SiHF}$                                                           | $1.236 \cdot 10^9$    | 1.28  | 1.52  | by equilibrium        |      |       | calc. |
| 83 | $\text{Si} + \text{HF} \rightleftharpoons \text{SiF} + \text{H}$                                                 | $1.963 \cdot 10^8$    | 1.59  | 9818  | by equilibrium        |      |       | calc. |
| 84 | $\text{SiH}_2 + \text{HF} \rightleftharpoons \text{SiH}_3\text{F}$                                               | $1.620 \cdot 10^4$    | 2.38  | 2357  | by equilibrium        |      |       | calc. |
| 85 | $\text{SiH}_4 + \text{HF} \rightleftharpoons \text{SiH}_3\text{F} + \text{H}_2$                                  | $1.097 \cdot 10^5$    | 2.39  | 16335 | by equilibrium        |      |       | calc. |
| 86 | $\text{SiF}_2 + \text{H} \rightleftharpoons \text{SiF} + \text{HF}$                                              | $1.129 \cdot 10^9$    | 1.46  | 21938 | by equilibrium        |      |       | calc. |
| 87 | $\text{SiHF} + \text{H} \rightleftharpoons \text{SiF} + \text{H}_2$                                              | $4.359 \cdot 10^9$    | 1.59  | 318   | by equilibrium        |      |       | calc. |
| 88 | $\text{SiH}_4 \rightleftharpoons \text{SiH}_2 + \text{H}_2$                                                      | $1.585 \cdot 10^{28}$ | -4.79 | 30420 | by equilibrium        |      |       | 12    |
| 89 | $\text{SiH}_2 \rightleftharpoons \text{Si} + \text{H}_2$                                                         | $1.202 \cdot 10^{12}$ | 0.5   | 0     | by equilibrium        |      |       | 12    |

<sup>1</sup> D. L. Baulch, C.J. Cobos, R. A. Cox, C. Esser, P. Frank, Th. Just, J. A. Kerr, M. J. Pilling, J.

- 
- Troe, R. W. Walker and J. Warnatz, *J. Phys. Chem. Ref. Data* **1992**, 21, 411.
- <sup>2</sup> D. L. Baulch, C. T. Bowman, C. J. Cobos, R. A. Cox, Th. Just, J. A. Kerr, M. J. Milling, D. Stocker, J. Troe, W. Tsang, R. W. Walker and J. Warnatz, *J. Phys. Chem. Ref. Data* **2005**, 34, 757.
- <sup>3</sup> C. D. Pintassilgo, J. Loureiro, G. Cernogora and M. Touzeay, *Plasma Sources Sci. Technol.* **1999**, 8, 463.
- <sup>4</sup> W. Tsang and R. F. Hampson, *J. Phys. Chem. Ref. Data* **1986**, 15, 1087.
- <sup>5</sup> D. L. Baulch, C. J. Cobos, R. A. Cox, P. Frank, G. Hayman, Th. Just, J. A. Kerr, T. Murrells, M. J. Pilling, J. Troe, R. W. Walker and J. Warnatz, *J. Phys. Chem. Ref. Data* **1994**, 23, 847.
- <sup>6</sup> N. S. Titova, P. S. Kuleshov and A. M. Starik, *Combustion, Explosion, and Shock Waves*, **2011**, 47, 249.
- <sup>7</sup> M. D. Allendorf and R. J. Kee, *J. Electrochem. Soc.* **1991**, 138, 841.
- <sup>8</sup> L. B. Harding, Y. Georgievskii and S. J. Klippenstein, *J. Phys. Chem. A* **2005**, 109, 4646.
- <sup>9</sup> X. Yang, F. Goldsmith and R. S. Tranter, *J. Phys. Chem. A* **2009**, 113, 8307.
- <sup>10</sup> W. Tsang, *J. Phys. Chem. Ref. Data* **1991**, 20, 221.
- <sup>11</sup> W. Tsang, *J. Phys. Chem. Ref. Data* **1988**, 17, 887.
- <sup>12</sup> A. Fiorucci, D. Moscatelli and M. Masi, *Surf. Coat. Technol.* **2007**, 201, 8825.
